# Supplementary material
Source: PubMed Central journal article supplement (PMC5902788)
Supplement: id7b00244_si_003.pdf [file id7b00244_si_003.pdf]

## Supporting Information

Genetically Validated Drug Targets in Leishmania; Current Knowledge and Future Prospects

Nathaniel G. Jones, Carolina M.C. Catta-Preta, Ana Paula C.A. Lima, Jeremy C. Mottram

Pages: 0

Figures: 0

Tables: 2

Table S1:

List of genes where deletion attempts in human pathogenic *Leishmania* species have been published. Includes information for: Gene ID, name, product, species, year of publication, originating lab, reference, method and result of deletion, and quality score. Panel 1 for essential genes, Panel 2 for non-essential genes.

Table S2:

List of genes where deletion attempts in *Trypanosoma cruzi* have been published. Includes information for: Gene ID, name, product, year of publication, originating lab, reference, method and result of deletion and quality score. Panel 1 for essential genes, Panel 2 for non-essential genes.
